# Supplementary material
Source: PubMed Central journal article supplement (PMC3919553)
Supplement: NIHMS535289-supplement-Supplementary_Figure_1n.pdf [file NIHMS535289-supplement-Supplementary_Figure_1n.pdf]

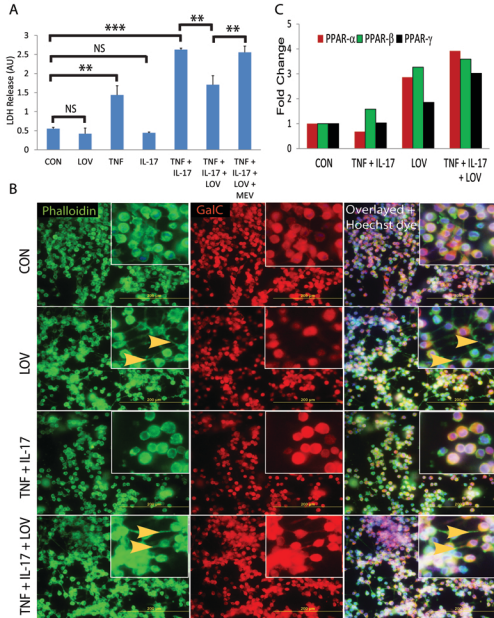

**Supplementary Fig. 1:** LOV enhances PPARs expression in B12 cells exposed to cytokines. B12 cells (2,000 x cm<sup>2</sup>) were treated with LOV (2.0 μM) or other pharmacological agents and cytokines as detailed in the Fig. 1 legend. A, the composite mean ± S.E. Of 3-4 samples analyzed in triplicate depict LDH release in the culture supernatants of treated B12 cells for 96 h. B, the representative field of the similarly treated B12 on slides and labeled by using Alexa-Four 488 conjugated phalloidin that binds to F-actin in processes and anti-GalC antibodies to detect maturing cells. Slides were counterstained with nuclear Hoechst dye. Inserts are the magnified region (square) in the representative field. Arrowheads depict the processes of treated cells. C, the average of three samples analyzed in duplicate depicts the levels of PPAR subtypes mRNA transcripts in treated B12 cells for 24 h. Statistical significance as \* P<0.05; \*\* P<0.01; \*\*\* P<0.001; NS, not significant.
