# Supplementary material
Source: PubMed Central journal article supplement (PMC3919553)
Supplement: NIHMS535289-supplement-Supplementary_Figure_2n.pdf [file NIHMS535289-supplement-Supplementary_Figure_2n.pdf]

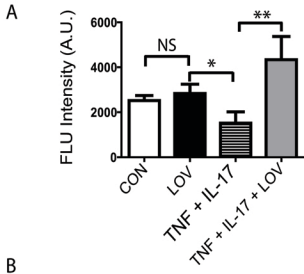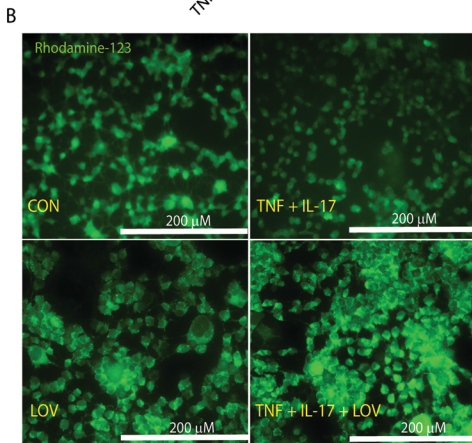

**Supplementary Fig. 2:** LOV attenuates mitochondrial membrane depolarization in OLS exposed to cytokines. OLS were exposed to cytokines in the presence or absence of LOV as detailed in the Fig. 1 legend. A, the composite mean  $\pm$  S.E. of 3-4 samples analyzed in triplicate by using Rh-123 dye in treated OLS for 48 h that depicts fluorescence (FLU) intensity (arbitrary units; AU). B, the representative fields of the slides depict the restoration of green (mitochondrial membrane potential) in OLS treated for 48 h. Statistical significance as indicated: \*  $P < 0.05$ , \*\*  $P < 0.01$  and NS, not significant.
